# Supplementary material
Source: Springer Nature journal article supplement (https://www.springermedizin.de/resource/supplementary/13223_2013_490_MOESM3_ESM.pdf/9596632)
Supplement: MOESM3 [file 9596632]

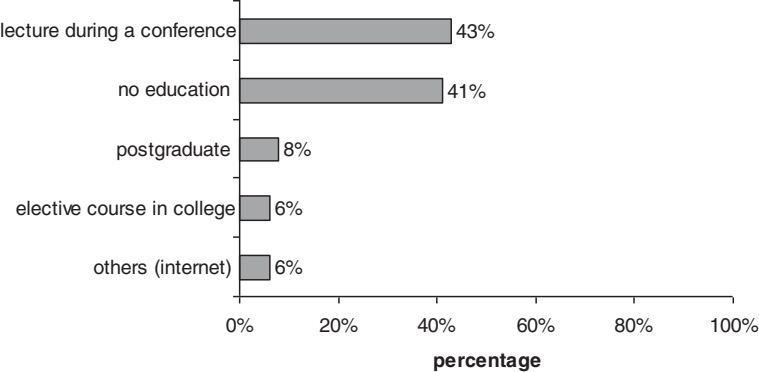

lecture during a conference

43%

no education

41%

postgraduate

8%

elective course in college

6%

others (internet)

6%

0%

20%

40%

60%

80%

100%

percentage
